# Supplementary material for: Novel Adaption of the SARC-F Score to Classify Pediatric Hemato-Oncology Patients with Functional Sarcopenia
Source: MDPI journal article supplement (doi:10.3390/cancers15010320), 2023-01-03
Supplement: s1 [file s1]

**Table S2. Characteristics of individual patients at their first physiotherapy assessment (n=167)**

|                                             | No.   | %                  |
|---------------------------------------------|-------|--------------------|
| Sex                                         |       |                    |
| Boy                                         | 105   | 62.9               |
| Girl                                        | 62    | 37.1               |
| Type of hematological disease               |       |                    |
| Acute lymphoblastic leukemia                | 102   | 61                 |
| Acute myeloid leukemia                      | 18    | 10.8               |
| Chronic myeloid leukemia                    | 4     | 2.4                |
| Hodgkin lymphoma                            | 8     | 4.8                |
| Non-hodgkin lymphoma                        | 13    | 7.8                |
| Myelodysplastic syndrome                    | 6     | 3.6                |
| Fanconi anemia                              | 8     | 4.8                |
| Aplastic anemia                             | 2     | 1.2                |
| Other*                                      | 6     | 3.6                |
| Treatment phase                             |       |                    |
| Intensive chemotherapy                      | 51    | 30.5               |
| Maintenance chemotherapy                    | 46    | 27.5               |
| 1-12 months after chemotherapy cessation    | 16    | 9.6                |
| Pre SCT conditioning phase                  | 29    | 17.4               |
| 3-12 months post SCT                        | 25    | 15                 |
| Assessment performed during                 |       |                    |
| Clinical admission                          | 34    | 20.4               |
| Daycare admission / Outpatient clinic visit | 133   | 79.6               |
| Body Mass Index, categories                 |       |                    |
| Underweight                                 | 11    | 6.6                |
| Normal Weight                               | 114   | 68.2               |
| Overweight                                  | 31    | 18.6               |
| Obesity                                     | 11    | 6.6                |
|                                             | Mean  | Median [IQR]       |
| Age, years                                  | 11.7  | 12.7 [7.5 to 15.6] |
| Height, SDS                                 | -0.27 | -0.22 [-1 to 0.47] |
| Weight, SDS                                 | 0.30  | 0.20 [-0.8 to 1.2] |
| Body Mass Index, SDS                        | 0.36  | 0.32 [-0.8 to 1.5] |

Abbreviations: SCT = stem cell transplantation, IQR = interquartile range, SDS = standard deviation score

\*Blastic plasma cytotid dendritic cell neoplasm (n = 1), common variable immunodeficiency (n = 1), de novo acute promyelocytic leukemia (n =1), Diamond-Blackfan anemia (n = 1), Langerhans cell histiocytosis (n = 1), Paroxysmal nocturnal hemoglobinuria (n = 1)
