# Supplementary material for: Novel Adaption of the SARC-F Score to Classify Pediatric Hemato-Oncology Patients with Functional Sarcopenia
Source: MDPI journal article supplement (doi:10.3390/cancers15010320), 2023-01-03
Supplement: s1 [file s1]

| <b>Table S3. Diagnostic accuracy for the sarcopenia phenotype at different cut-off points of the PED-SARC-F</b>                    |                       |                   |           |
|------------------------------------------------------------------------------------------------------------------------------------|-----------------------|-------------------|-----------|
|                                                                                                                                    | Functional Sarcopenia |                   |           |
|                                                                                                                                    | Yes                   | No                |           |
| PED-SARC-F score                                                                                                                   |                       |                   |           |
| ≥1                                                                                                                                 | 44                    | 96                | PPV: 0.31 |
| <1                                                                                                                                 | 2                     | 73                | NPV: 0.97 |
|                                                                                                                                    | Sensitivity: 0.96     | Specificity: 0.43 |           |
| AUC: 0.69 (95% CI: 0.65 to 0.74)                                                                                                   |                       |                   |           |
| PED-SARC-F score                                                                                                                   |                       |                   |           |
| ≥2                                                                                                                                 | 43                    | 77                | PPV: 0.36 |
| <2                                                                                                                                 | 3                     | 92                | NPV: 0.97 |
|                                                                                                                                    | Sensitivity: 0.93     | Specificity: 0.54 |           |
| Diagnostic accuracy: 0.74 (95% CI: 0.69 to 0.79)                                                                                   |                       |                   |           |
| PED-SARC-F score                                                                                                                   |                       |                   |           |
| ≥3                                                                                                                                 | 42                    | 52                | PPV: 0.45 |
| <3                                                                                                                                 | 4                     | 117               | NPV: 0.97 |
|                                                                                                                                    | Sensitivity: 0.91     | Specificity: 0.69 |           |
| Diagnostic accuracy: 0.80 (95% CI: 0.75 to 0.86)                                                                                   |                       |                   |           |
| PED-SARC-F score                                                                                                                   |                       |                   |           |
| ≥4                                                                                                                                 | 36                    | 29                | PPV: 0.55 |
| <4                                                                                                                                 | 10                    | 140               | NPV: 0.93 |
|                                                                                                                                    | Sensitivity: 0.78     | Specificity: 0.83 |           |
| Diagnostic accuracy: 0.81 (95% CI: 0.74 to 0.87)                                                                                   |                       |                   |           |
| PED-SARC-F score                                                                                                                   |                       |                   |           |
| ≥5                                                                                                                                 | 34                    | 16                | PPV: 0.68 |
| <5                                                                                                                                 | 12                    | 153               | NPV: 0.93 |
|                                                                                                                                    | Sensitivity: 0.74     | Specificity: 0.91 |           |
| Diagnostic accuracy: 0.82 (95% CI: 0.75 to 0.89)                                                                                   |                       |                   |           |
| PED-SARC-F score                                                                                                                   |                       |                   |           |
| ≥6                                                                                                                                 | 27                    | 6                 | PPV: 0.82 |
| <6                                                                                                                                 | 19                    | 163               | NPV: 0.90 |
|                                                                                                                                    | Sensitivity: 0.59     | Specificity: 0.96 |           |
| Diagnostic accuracy: 0.78 (95% CI: 0.7 to 0.85)                                                                                    |                       |                   |           |
| PED-SARC-F score                                                                                                                   |                       |                   |           |
| ≥7                                                                                                                                 | 21                    | 3                 | PPV: 0.88 |
| <7                                                                                                                                 | 25                    | 166               | NPV: 0.87 |
|                                                                                                                                    | Sensitivity: 0.46     | Specificity: 0.98 |           |
| Diagnostic accuracy: 0.72 (95% CI: 0.65 to 0.79)                                                                                   |                       |                   |           |
| PED-SARC-F score                                                                                                                   |                       |                   |           |
| ≥8                                                                                                                                 | 16                    | 1                 | PPV: 1    |
| <8                                                                                                                                 | 30                    | 168               | NPV: 0.82 |
|                                                                                                                                    | Sensitivity: 0.22     | Specificity: 1    |           |
| Diagnostic accuracy: 0.67 (95% CI: 0.6 to 0.74)                                                                                    |                       |                   |           |
| PED-SARC-F score                                                                                                                   |                       |                   |           |
| ≥9                                                                                                                                 | 10                    | 0                 | PPV: 0.7  |
| <9                                                                                                                                 | 36                    | 169               | NPV: 0.82 |
|                                                                                                                                    | Sensitivity: 0.16     | Specificity: 0.98 |           |
| Diagnostic accuracy: 0.61 (95% CI: 0.55 to 0.67)                                                                                   |                       |                   |           |
| PED-SARC-F score                                                                                                                   |                       |                   |           |
| ≥10                                                                                                                                | 3                     | 0                 | PPV: 1    |
| <10                                                                                                                                | 43                    | 169               | NPV: 0.8  |
|                                                                                                                                    | Sensitivity: 0.07     | Specificity: 1    |           |
| Diagnostic accuracy: 0.53 (95% CI: 0.5 to 0.57)                                                                                    |                       |                   |           |
| Abbreviations: AUC = area under the curve PPV = positive predicted value, NPV = negative predicted value, CI = Confidence interval |                       |                   |           |
