# Supplementary material for: Novel Adaption of the SARC-F Score to Classify Pediatric Hemato-Oncology Patients with Functional Sarcopenia
Source: MDPI journal article supplement (doi:10.3390/cancers15010320), 2023-01-03
Supplement: s1 [file s1]

**Table S1. Description of patients with  $\geq 1$  physiotherapy assessment(s)**

| Patient | Tumor type       | Assessment no. | At time of physiotherapy assessment |                        |                   |
|---------|------------------|----------------|-------------------------------------|------------------------|-------------------|
|         |                  |                | Age, years                          | Treatment phase        | PED- SARC-F score |
| 1       | AML              | 1              | 16.4                                | Pre SCT                | 4                 |
|         |                  | 2              | 17.3                                | 10 months post SCT     | 4                 |
| 2       | BPDCN            | 1              | 15.4                                | 3 months post SCT      | 6                 |
|         |                  | 2              | 15.9                                | 9 months post SCT      | 3                 |
| 3       | SAA              | 1              | 16.4                                | 7 months post SCT      | 2                 |
|         |                  | 2              | 16.8                                | 12 months post SCT     | 0                 |
| 4       | Pre B-ALL        | 1              | 3.3                                 | First week of therapy  | 2                 |
|         |                  | 2              | 3.6                                 | End of induction phase | 8                 |
| 5       | Pre B-ALL        | 1              | 3.8                                 | Consolidation phase    | 9                 |
|         |                  | 2              | 5.4                                 | Pre SCT                | 3                 |
|         |                  | 3              | 5.6                                 | 3 months post SCT      | 2                 |
| 6       | MDS              | 1              | 14.4                                | Pre SCT                | 2                 |
|         |                  | 2              | 14.8                                | 3 months post SCT      | 0                 |
| 7       | Pre B-ALL        | 1              | 3.8                                 | Pre SCT                | 7                 |
|         |                  | 2              | 4.3                                 | 5 months post SCT      | 4                 |
| 8       | Pre B-ALL        | 1              | 7.5                                 | Induction phase        | 5                 |
|         |                  | 2              | 8                                   | Consolidation phase    | 3                 |
| 9       | T-ALL            | 1              | 16.7                                | Induction phase        | 3                 |
|         |                  | 2              | 17.4                                | Maintenance phase      | 0                 |
| 10      | BCR-ABL-like ALL | 1              | 17.3                                | 3 months post SCT      | 3                 |
|         |                  | 2              | 17.5                                | 5 months post SCT      | 3                 |
| 11      | Pre B-ALL        | 1              | 15.4                                | Pre SCT                | 0                 |
|         |                  | 2              | 15.7                                | 3 months post SCT      | 1                 |
| 12      | FA               | 1              | 12.5                                | 3 months post SCT      | 2                 |
|         |                  | 2              | 12.8                                | 6 months post SCT      | 0                 |
| 13      | T-ALL            | 1              | 9.8                                 | Pre SCT                | 5                 |
|         |                  | 2              | 10.3                                | 3 months post SCT      | 3                 |
| 14      | Pre B-ALL        | 1              | 15.5                                | Induction phase        | 5                 |
|         |                  | 2              | 16.5                                | Consolidation phase    | 3                 |
| 15      | Pre B-ALL        | 1              | 16.6                                | Induction phase        | 5                 |
|         |                  | 2              | 17.7                                | Maintenance phase      | 0                 |
| 16      | C-ALL            | 1              | 16.5                                | Induction phase        | 4                 |
|         |                  | 2              | 17.4                                | Maintenance phase      | 2                 |
|         |                  | 3              | 17.6                                | At therapy cessation   | 1                 |
| 17      | FA               | 1              | 7.5                                 | Pre SCT                | 0                 |
|         |                  | 2              | 7.8                                 | 3 months post SCT      | 0                 |
| 18      | C-ALL            | 1              | 12.7                                | 3 months post SCT      | 6                 |
|         |                  | 2              | 12.9                                | 7 months post SCT      | 3                 |
| 19      | AML              | 1              | 17.3                                | Pre SCT                | 0                 |
|         |                  | 2              | 17.5                                | 3 months post SCT      | 0                 |
| 20      | AML              | 1              | 14.5                                | 3 months post SCT      | 2                 |
|         |                  | 2              | 14.9                                | 8 months post SCT      | 0                 |
| 21      | T-ALL            | 1              | 11.4                                | Pre SCT                | 1                 |
|         |                  | 2              | 11.8                                | 3 months post SCT      | 3                 |
| 22      | Pre B-ALL        | 1              | 18.2                                | Maintenance phase      | 3                 |

|    |           |   |      |                                    |   |
|----|-----------|---|------|------------------------------------|---|
|    |           | 2 | 18.5 | Maintenance phase                  | 1 |
|    |           | 3 | 19.5 | 6 weeks post therapy<br>cessation  | 1 |
| 23 | FA        | 1 | 8.5  | Pre SCT                            | 0 |
|    |           | 2 | 8.9  | 3 months post SCT                  | 0 |
| 24 | Pre B-ALL | 1 | 8.1  | Maintenance phase                  | 7 |
|    |           | 2 | 9.9  | 3 months post therapy<br>cessation | 0 |
| 25 | Pre B-ALL | 1 | 12   | Maintenance phase                  | 4 |
|    |           | 2 | 12.6 | Pre SCT                            | 0 |
|    |           | 3 | 13   | 4 months post SCT                  | 0 |
| 26 | MDS       | 1 | 13.3 | Pre SCT                            | 0 |
|    |           | 2 | 14.1 | 6 months post SCT                  | 0 |
| 27 | Pre B-ALL | 1 | 7.5  | Induction phase                    | 2 |
|    |           | 2 | 8.8  | Maintenance phase                  | 0 |
| 28 | AML       | 1 | 15.1 | 3 months post SCT                  | 3 |
|    |           | 2 | 15.3 | 6 months post SCT                  | 0 |
| 29 | FA        | 1 | 13.9 | Pre SCT                            | 0 |
|    |           | 2 | 14.3 | 3 months post SCT                  | 0 |
| 30 | FA        | 1 | 10.4 | Pre SCT                            | 2 |
|    |           | 2 | 10.8 | 3 months post SCT                  | 1 |
|    |           | 3 | 11.3 | 9 months post SCT                  | 0 |
| 31 | Pre B-ALL | 1 | 17   | Maintenance phase                  | 6 |
|    |           | 2 | 17.4 | Maintenance phase                  | 0 |
| 32 | Pre B-ALL | 1 | 11.2 | Maintenance phase                  | 3 |
|    |           | 2 | 11.5 | Maintenance phase                  | 5 |
| 33 | Pre B-ALL | 1 | 17.9 | Induction phase                    | 5 |
|    |           | 2 | 18.4 | Maintenance phase                  | 4 |
| 34 | NHL       | 1 | 11.7 | Pre SCT                            | 0 |
|    |           | 2 | 12.2 | 6 months post SCT                  | 9 |
|    |           | 3 | 12.5 | 9 months post SCT                  | 5 |
| 35 | AML       | 1 | 14.6 | Pre SCT                            | 3 |
|    |           | 2 | 14.9 | 3 months post SCT                  | 3 |
| 36 | Pre B-ALL | 1 | 17   | Induction phase                    | 7 |
|    |           | 2 | 18.8 | Maintenance phase                  | 3 |
|    |           | 3 | 19.1 | 3 months post therapy<br>cessation | 0 |
| 37 | AML       | 1 | 11.3 | Intensive chemotherapy             | 3 |
|    |           | 2 | 11.8 | 3 months post SCT                  | 0 |
| 38 | Pre B-ALL | 1 | 8.3  | Induction phase                    | 6 |
|    |           | 2 | 8.9  | Maintenance phase                  | 6 |
| 39 | CML       | 1 | 11.8 | Pre SCT                            | 6 |
|    |           | 2 | 12.1 | 3 months post SCT                  | 2 |
| 40 | ALCL      | 1 | 13.7 | Pre SCT                            | 2 |
|    |           | 2 | 14.1 | 3 months post SCT                  | 1 |
| 41 | CML       | 1 | 15.6 | Pre SCT                            | 3 |
|    |           | 2 | 16.1 | 3 months post SCT                  | 2 |

Abbreviations:

---

AML = acute myeloid leukemia, BPDCN = blastic plasmacytoid dendritic cell neoplasm, SAA = severe aplastic anemia, ALL = acute lymphoblastic leukemia, MDS = myelodysplastic syndrome, FA = Fanconi anemia, NHL = Non-hodgkin lymphoma, ALCL = anaplastic large cell lymphoma

---
