# Supplementary material for: Novel Adaption of the SARC-F Score to Classify Pediatric Hemato-Oncology Patients with Functional Sarcopenia
Source: MDPI journal article supplement (doi:10.3390/cancers15010320), 2023-01-03
Supplement: s1 [file s1]

**PED-SARC-F:**

Q1. How much difficulty do you have in lifting something heavy?

Q2. How much difficulty do you have walking across a room?

Q3. How much difficulty do you have rising from the floor?

Q4. How much difficulty do you have climbing a flight of stairs?

Q5. How many times have you fallen in the last 2 weeks?

- Q1-4: A lot or unable / Q5:  $\geq 4$  falls
- Q1-4: Some difficulties / Q5: 1-3 falls
- Q1-5: None

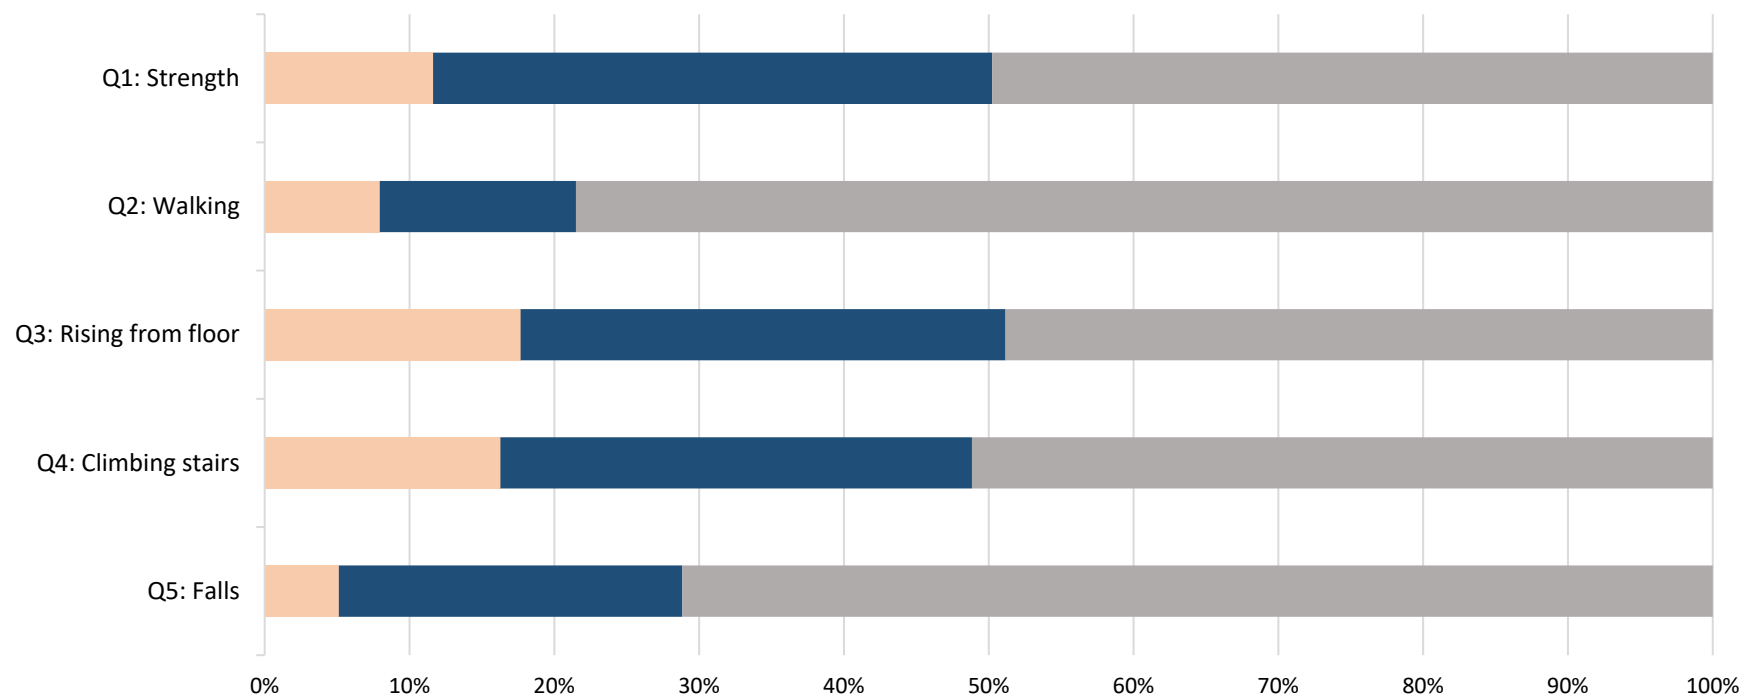

Figure S1. The pediatric SARC-F (PED-SARC-F) and the results on the individual questions
